# Supplementary material for: A meta-analysis of sublingual allergen immunotherapy and pharmacotherapy in pollen-induced seasonal allergic rhinoconjunctivitis
Source: PubMed Central journal article supplement (PMC4101870; doi:10.1186/1741-7015-12-71), 2014-05-01
Supplement: 1741-7015-12-71-S2.pdf [file 1741-7015-12-71-S2.pdf]

Additional Table 2. Pharmacotherapy and grass pollen SLIT tablet trials in seasonal allergic rhinitis

| <b>H1-antihistamines</b> |             |                               |                                     |                               |                                |                                      |                         |
|--------------------------|-------------|-------------------------------|-------------------------------------|-------------------------------|--------------------------------|--------------------------------------|-------------------------|
| <b>Product</b>           | <b>Dose</b> | <b>Publication</b>            | <b>Population age</b>               | <b>n (Active)<sup>‡</sup></b> | <b>n (Placebo)<sup>‡</sup></b> | <b>Type of score*</b>                | <b>Treatment period</b> |
| desloratadine            | 5 mg        | Meltzer Clin Drug Invest 2001 | 12 to 65, no mean or median given   | 172                           | 174                            | Spring, T8SS, reflective 12-hr am/pm | 14 days                 |
| desloratadine            | 5 mg        | Meltzer Clin Drug Invest 2001 | 12 to 65, no mean or median given   | 164                           | 164                            | Fall, T8SS, reflective 12-hr am/pm   | 14 days                 |
| desloratadine            | 5 mg        | Raphael AAAI 2006             | 12 to 65 (mean Ac 34.0, PI 36.4)    | 198                           | 197                            | T8SS, daily 24-hour reflective       | 7 days                  |
| desloratadine            | 5 mg        | Pradalier Allergy 2007        | 18 or older (mean Ac 32.7, PI 32.4) | 234                           | 249                            | T8SS, am/pm                          | 14 days                 |
| desloratadine            | 5 mg        | Bachert Allergy 2009          | 12 to 70 (mean Ac                   | 242                           | 245                            | T8SS, daily                          | 14                      |

|                |       |                                 |                                      |     |     |                             |         |
|----------------|-------|---------------------------------|--------------------------------------|-----|-----|-----------------------------|---------|
|                |       |                                 | 29.8, PI 30.6                        |     |     |                             |         |
| bilastine      | 20 mg | Bachert Allergy 2009            | 12 to 70 (mean Ac<br>30.6, PI 30.6)  | 233 | 245 | T10SS, 12-hr<br>reflective  | 14 days |
| bilastine      | 20 mg | Kuna CEA 2009                   | 12 to 70 (mean Ac<br>31.16; PI 30.2) | 216 | 205 | reflective T7SS             | 14 days |
| levocetirizine | 5 mg  | Leynadier Acta ORL<br>Belg 2001 | 18 to 72 [median Ac<br>31, PI 31)    | 115 | 118 | T4SS, 24-hour<br>reflective | 14 days |
| levocetirizine | 5 mg  | Segall AAAI 2010                | 18 to 65 (mean Ac<br>38.7, PI 37.5)  | 284 | 290 | T5SS, 24-hour<br>reflective | 14 days |
| loratadine     | 10 mg | Nayak AAAI 2002                 | 15 to 82 (mean Ac 37,<br>PI 37)      | 301 | 149 | T4NSS daytime               | 14 days |
| loratadine     | 10 mg | Philip Clin Exp Allergy<br>2002 | 15 to 81 (mean Ac 36,<br>PI 36)      | 602 | 352 | T8SS daytime                | 14 days |
| loratadine     | 10 mg | van Adelsberg AAAI<br>2003      | 15 to 85 (mean Ac 35,<br>PI 36)      | 171 | 521 | T4NSS, daytime              | 14 days |
| loratadine     | 10 mg | van Adelsberg Allergy<br>2003   | 15 to 82 (mean Ac 39,<br>PI 36)      | 170 | 410 | T4NSS                       | 14 days |

|              |                                  |                     |                                  |     |     |                           |         |
|--------------|----------------------------------|---------------------|----------------------------------|-----|-----|---------------------------|---------|
| loratadine   | 10 mg                            | Anolik AAAI 2008    | 12 to 66 (mean Ac 25, PI 26)     | 173 | 157 | T8SS, patient-reported    | 15 days |
| fexofenadine | 120 mg                           | Bernstein AAAI 1997 | 12 to 65 (mean Ac 32; PI 33)     | 144 | 141 | T8SS, 12-hr reflc.        | 14 days |
| fexofenadine | 120 mg                           | Howarth JACI 1999   | 12 to 66 (mean Ac 33 ; PI 34)    | 211 | 201 | T4SS, 24-hr reflc.TSS     | 14 days |
| fexofenadine | 30 mg                            | Wahn JACI 2003      | 6 to 11 (mean Ac 8.8, PI 8.8)    | 460 | 465 | T9SS, PM-reflective       | 14 days |
| cetirizine   | 10 mg                            | Kuna CEA 2009       | 12 to 70 (mean Ac 31.8; PI 30.2) | 225 | 205 | reflective T7SS           | 14 days |
| cetirizine   | 10 mg                            | Howarth JACI 1999   | 12 to 66 (mean Ac 33; PI 34)     | 207 | 201 | T4SS, 24-hr reflc.TSS     | 14 days |
| azelastine   | 2 sprays per nostril twice daily | Berger AAAI 2003    | 12 to 79 (mean Ac 36; PI 37)     | 108 | 111 | T4NSS, 12-hour reflective | 14 days |
| azelastine   | 1 spray per                      | LaForce AAAI 2004   | 12 to 80 (mean Ac 35;            | 112 | 110 | T4NSS, 12-hour            | 14 days |

|                         |                                  |                           |                                 |                               |                                |                                              |                         |
|-------------------------|----------------------------------|---------------------------|---------------------------------|-------------------------------|--------------------------------|----------------------------------------------|-------------------------|
|                         | nostril, twice daily             |                           | PI 35 )                         |                               |                                | reflective                                   |                         |
| azelastine              | 1 spray per nostril, twice daily | Lumry AAAI 2007 (study 1) | 12 to 73 (mean Ac 33; PI 35)    | 139                           | 141                            | T4NSS, combined morning + evening reflective | 14 days                 |
| azelastine              | 1 spray per nostril, twice daily | Lumry AAAI 2007 (study 2) | 12 to 75 (mean Ac 35; PI 36)    | 137                           | 137                            | T4NSS, combined morning + evening reflective | 14 days                 |
| <b>Nasal corticoids</b> |                                  |                           |                                 |                               |                                |                                              |                         |
| <b>Product</b>          | <b>Dose</b>                      | <b>Publication</b>        | <b>Population age</b>           | <b>n (Active)<sup>‡</sup></b> | <b>n (Placebo)<sup>‡</sup></b> | <b>Type of score*</b>                        | <b>Treatment period</b> |
| ciclesonide             | 200 µg QD                        | Ratner JACI 2006          | 12 or older (mean Ac 39, PI 41) | 164                           | 163                            | T4NSS, 12-hour reflective                    | 14 days                 |
| beclomethasone          | 168 µg BID                       | Graft JACI 1996           | 12 to 69 (mean Ac 34,           | 112                           | 104                            | T4NSS                                        | 28 days                 |

|                     |           |                            |                                                           |     |     |                           |         |
|---------------------|-----------|----------------------------|-----------------------------------------------------------|-----|-----|---------------------------|---------|
| dipropionate        |           |                            | PI 34)                                                    |     |     |                           |         |
| mometasone furoate  | 200 µg QD | Graft JACI 1996            | 12 to 69 (mean Ac 36, PI 34)                              | 114 | 101 | T4NSS                     | 28 days |
| mometasone furoate  | 200 µg QD | Hebert Allergy 1996        | 18 to 73 (mean Ac 33, PI 33)                              | 122 | 110 | T4NSS (physician-rated)   | 8 days  |
| mometasone furoate  | 200 µg QD | Gawchik AAAI 2003          | 12 or older (mean Ac 34.7, PI 34.2)                       | 122 | 123 | T4NSS + cough day         | 14 days |
| fluticasone furoate | 110 µg    | Martin Allergy Asthma 2007 | 12 or older ("mean 39.3", no separate data for Ac and PI) | 127 | 128 | T4NSS, 12-hour reflective | 14 days |
| fluticasone furoate | 110 µg    | Kaiser JACI 2007           | 12 or older (mean Ac 35.4, PI 34.5)                       | 151 | 148 | T4NSS, 12-hour reflective | 14 days |
| mometasone furoate  | 200 µg QD | Prenner JACI 2010          | 12 or older (mean Ac 34.5, PI 36.8)                       | 220 | 209 | T4NSS, am + pm reflective | 15 days |
| mometasone furoate  | 200 µg QD | Anolik AAAI 2008           | 12 to 71 (mean Ac 26, PI 26)                              | 166 | 165 | T8SS, patient-reported    | 15 days |

| <b>Montelukast</b>                                     |             |                              |                              |                    |                     |                       |                         |
|--------------------------------------------------------|-------------|------------------------------|------------------------------|--------------------|---------------------|-----------------------|-------------------------|
| <b>Product</b>                                         | <b>Dose</b> | <b>Publication</b>           | <b>Population age</b>        | <b>n (Active)‡</b> | <b>n (Placebo)‡</b> | <b>Type of score*</b> | <b>Treatment period</b> |
| montelukast                                            | 10 mg       | van Adelsberg Allergy 2003   | 15 to 82 (mean Ac 36, PI 36) | 448                | 451                 | T4NSS                 | 14 days                 |
| montelukast                                            | 10 mg       | van Adelsberg AAAI 2003      | 15 to 85 (mean Ac 36, PI 36) | 522                | 521                 | T4NSS, daytime        | 14 days                 |
| montelukast                                            | 10 mg       | Philip Clin Exp Allergy 2002 | 15 to 81 (mean Ac 37, PI 36) | 348                | 352                 | T8SS daytime          | 14 days                 |
| montelukast                                            | 10 mg       | Nayak AAAI 2002              | 15 to 82 (mean Ac 35, PI 37) | 155                | 149                 | T4NSS daytime         | 14 days                 |
| <b>MP29-02 (an azelastine-fluticasone combination)</b> |             |                              |                              |                    |                     |                       |                         |
| <b>Product</b>                                         | <b>Dose</b> | <b>Publication</b>           | <b>Population age</b>        | <b>n (Active)‡</b> | <b>n (Placebo)‡</b> | <b>Type of score*</b> | <b>Treatment period</b> |
| MP29-02                                                | 137 mg      | Carr JACI 2012 (study        | >12 (mean Ac , PI )          | 207                | 209                 | T4NSS, T3OSS:         | 14 days                 |

|                                                        |                                                            |                                  |                     |     |     |                                                               |         |
|--------------------------------------------------------|------------------------------------------------------------|----------------------------------|---------------------|-----|-----|---------------------------------------------------------------|---------|
|                                                        | azelastine/50<br>mg<br>fluticasone<br>propionate           | MP4002)                          |                     |     |     | (12-hour<br>reflective and<br>instantaneous)                  |         |
| MP29-02                                                | 137 mg<br>azelastine/50<br>mg<br>fluticasone<br>propionate | Carr JACI 2012 (study<br>MP4004) | >12 (mean Ac , Pl ) | 193 | 200 | T4NSS, T3OSS:<br>(12-hour<br>reflective and<br>instantaneous) | 14 days |
| MP29-02                                                | 137 mg<br>azelastine/50<br>mg<br>fluticasone<br>propionate | Carr JACI 2012 (study<br>MP4006) | >12 (mean Ac , Pl ) | 446 | 448 | T4NSS, T3OSS:<br>(12-hour<br>reflective and<br>instantaneous) | 14 days |
| Grass pollen sublingual allergen immunotherapy tablets |                                                            |                                  |                     |     |     |                                                               |         |

| <b>Product</b>    | <b>Dose</b>                   | <b>Publication</b> | <b>Population age</b>            | <b>n (Active)<sup>‡</sup></b> | <b>n (Placebo)<sup>‡</sup></b> | <b>Type of score*</b> | <b>Treatment period</b>           |
|-------------------|-------------------------------|--------------------|----------------------------------|-------------------------------|--------------------------------|-----------------------|-----------------------------------|
| Five-grass tablet | 300 IR                        | Wahn JACI 2009     | 5 to 17 (mean Ac 10.5, PI 11.2 ) | 131                           | 135                            | T6SS=RTSS             | 6 months, single treatment season |
| Five-grass tablet | 300 IR                        | Didier JACI 2007   | 18 to 45 (mean Ac 28.7, PI 29.1) | 136                           | 148                            | T6SS=RTSS             | 6 months, single treatment season |
| Five-grass tablet | 300 IR                        | Cox JACI 2012      | 18 to 65 (mean Ac 36.8, PI 37.6) | 208                           | 228                            | T6SS=RTSS             | 6 months, single treatment season |
| Five-grass tablet | 300 IR(group with 2 months of | Didier JACI 2011   | 18 to 50 (mean Ac 30.4, PI 30.2) | 147                           | 165                            | T6SS=RTSS             | 3.5 months each year for 3 years; |



|                   |                                                        |                  |                                   |     |     |           |                                                                              |
|-------------------|--------------------------------------------------------|------------------|-----------------------------------|-----|-----|-----------|------------------------------------------------------------------------------|
|                   | pre-seasonal treatment)                                |                  |                                   |     |     |           | efficacy data analyzed for the last season                                   |
| Five-grass tablet | 300 IR (group with 4 months of pre-seasonal treatment) | Didier JACI 2011 | 18 to 50 (mean Ac 30.9, PI 30.2)  | 149 | 165 | T6SS=RTSS | 5.5 months each year for 3 years; efficacy data analyzed for the last season |
| Timothy tablet    | 75,000 SQ-T                                            | Nelson JACI 2011 | 18 to 65 (mean Ac 35,9 , PI 35,9) | 208 | 225 | T6SS=RTSS | 6 months, single treatment season                                            |
| Timothy tablet    | 75,000 SQ-T                                            | Blaiss JACI 2011 | 5 to 18 (mean Ac 12.1, PI 12.6)   | 173 | 167 | T6SS=RTSS | 6 months, single                                                             |

|                |             |                                        |                                     |     |     |           |                                                                 |
|----------------|-------------|----------------------------------------|-------------------------------------|-----|-----|-----------|-----------------------------------------------------------------|
|                |             |                                        |                                     |     |     |           | treatment<br>season                                             |
| Timothy tablet | 75,000 SQ-T | Bufe JACI 2009                         | 5 to 16 (mean Ac 10.1,<br>PI 10.1)  | 117 | 121 | T6SS=RTSS | 6 months,<br>single<br>treatment<br>season                      |
| Timothy tablet | 75,000 SQ-T | Durham JACI 2010                       | 18 to 65 (means not<br>reported)    | 160 | 127 | T6SS=RTSS | 3 years,<br>efficacy data<br>analyzed for<br>the last<br>season |
| Timothy tablet | 75,000 SQ-T | Durham JACI 2006                       | 18 to 65 (mean Ac 36,<br>PI 36)     | 294 | 286 | T6SS=RTSS | 4 months,<br>single<br>treatment<br>season                      |
| Timothy tablet | 75,000 SQ-T | Murphy J Negat<br>Results Biomed. 2013 | 18 to 65 (mean Ac<br>35.9, PI 35.9) | 163 | 166 | T6SS=RTSS | 3 to 5<br>months,                                               |

Devillier et al.

|  |  |  |  |  |  |  |                               |
|--|--|--|--|--|--|--|-------------------------------|
|  |  |  |  |  |  |  | single<br>treatment<br>season |
|--|--|--|--|--|--|--|-------------------------------|

TnNSS: total nasal symptom score with *n* symptoms; TnSS: total symptom score with *n* symptoms; TnOSS: total ocular symptom score with *n* symptoms; QD: once daily, BID; twice daily; IR: index of reactivity; SQ-T: standardized quality tablet. RTSS: rhinoconjunctivitis total symptom score; ‡ as used in the meta-analysis; \* as used in the meta-analysis and generally (but not always) the study's stated primary efficacy criterion.
