# Supplementary material for: A meta-analysis of sublingual allergen immunotherapy and pharmacotherapy in pollen-induced seasonal allergic rhinoconjunctivitis
Source: PubMed Central journal article supplement (PMC4101870; doi:10.1186/1741-7015-12-71), 2014-05-01
Supplement: 1741-7015-12-71-S4.pdf [file 1741-7015-12-71-S4.pdf]

Additional Table 4. Methodological differences in the evaluation of treatments for pollen-induced seasonal allergic rhinitis

| SOURCE OF VARIABILITY            | ALLERGEN IMMUNOTHERAPY                                                                                                                                                                         | SYMPTOMATIC MEDICATIONS                                                                                                                                                     | COMMENTS                                                                                                                                                                                                                  |
|----------------------------------|------------------------------------------------------------------------------------------------------------------------------------------------------------------------------------------------|-----------------------------------------------------------------------------------------------------------------------------------------------------------------------------|---------------------------------------------------------------------------------------------------------------------------------------------------------------------------------------------------------------------------|
| Study length and design          | <ul style="list-style-type: none"> <li>- Increased variability due to a longer evaluation period (30 days)</li> <li>- Pollen season variability</li> <li>- Use of rescue medication</li> </ul> | <ul style="list-style-type: none"> <li>- Shorter evaluation period (2 weeks)</li> <li>- Less variability in pollen counts</li> <li>- No use of rescue medication</li> </ul> |                                                                                                                                                                                                                           |
| Primary evaluation criterion     | The difference between the mean active treatment (Act) and placebo (Plc) scores over the entire pollen season<br><br>(30 days, on average)                                                     | The relative Act vs. Plc difference in reduction in (high) baseline scores                                                                                                  | The evaluation periods differ and penalize allergen immunotherapy (AIT), with dilution of the apparent RCI over the whole season.                                                                                         |
| Date and method of randomization | The patient is randomized according to his/her disease history (treatment is initiated preseasonally, before the disease symptoms appear)<br><br>The likelihood of a treatment effect          | Randomized patients must exceed a high, minimum symptom score observed at inclusion during the season (i.e. high disease activity is necessarily present).                  | Inclusion on the basis of disease history alone can lead to memory bias.<br><br>The likelihood of a treatment effect (improvement in symptoms) in an AIT trial does not solely depend on fluctuations in disease activity |
| Exposure to allergen             | (non-aggravation of symptoms)                                                                                                                                                                  | The likelihood of the treatment effect                                                                                                                                      |                                                                                                                                                                                                                           |

|                   |                                                                                          |                                                                                                                                                                                                                  |                                                                                                                                                |
|-------------------|------------------------------------------------------------------------------------------|------------------------------------------------------------------------------------------------------------------------------------------------------------------------------------------------------------------|------------------------------------------------------------------------------------------------------------------------------------------------|
|                   | depends on the patients' exposure to pollen and the predicted risk of disease occurrence | (improvement of symptoms) depends on fluctuations in disease activity only                                                                                                                                       |                                                                                                                                                |
| Baseline scores   | No baseline (BL) because patients are generally asymptomatic on inclusion (pre-season).  | Measurement of a baseline on inclusion yields pre- and post-treatment scores: a relative improvement in symptoms can be measured:<br>$([\text{Change in Act from BL} / \text{Change in Plc from BL}] - 1) * 100$ | The unpredictability and variability of exposure to the allergen - particularly for pollen - decreases the value of data collected at baseline |
| Symptom scores    | T6SS (4 nasal + 2 ocular) or more                                                        | Often a T4SS for H1-antihistamines and a T4NSS for nasal corticosteroids                                                                                                                                         | H1-antihistamine may not take account of nasal congestion.<br>Nasal corticosteroids do not often take ocular symptoms into account             |
| Rescue medication | Allowed, with interindividual variability in use                                         | Prohibited                                                                                                                                                                                                       | Represents an additional factor that decreases the RCI for active AIT, since rescue medication use is greater in the Plc group                 |
